# Supplementary material for: Knowledge, attitude and the associated factors regarding spectacle use among adults living in Debre Birhan Town, North Shewa, Ethiopia, 2023: a community-based, cross-sectional study
Source: HighWire-hosted journal article supplement (doi:10.1136/bmjopen-2024-086812), 2024-10-01
Supplement: bmjopen-2024-086812supp001_data_supplement.pdf [file bmjopen-2024-086812supp001_data_supplement.pdf]

**English version of the questionnaire that used to assess knowledge, attitude, and its associated factors towards spectacle used among adults living in Debre Birhan town, north Shewa, Ethiopia, 2023**

| Section one: Socio-demographic and economic data |                                                                          |                                                                                                                                                                         |
|--------------------------------------------------|--------------------------------------------------------------------------|-------------------------------------------------------------------------------------------------------------------------------------------------------------------------|
| S N                                              | Questions                                                                | Responses                                                                                                                                                               |
| 101                                              | Sex?                                                                     | 1. Male<br>2. Female                                                                                                                                                    |
| 102                                              | Age in years?                                                            | -----                                                                                                                                                                   |
| 103                                              | What is your current marital Status?                                     | 1. Not married<br>2. Married<br>3. Divorced<br>4. Widowed                                                                                                               |
| 104                                              | What is your educational status?                                         | 1. Unable to read and write<br>2. Able to read and write but have not received formal education<br>3. Primary school<br>4. Secondary School<br>5. Certificate and above |
| 105                                              | What is your occupational status?                                        | 1. Merchant<br>2. Government employed<br>3. Housewife<br>4. Private employed<br>5. Unemployed<br>6. Others specify it _____                                             |
| Section two: Information-related factors         |                                                                          |                                                                                                                                                                         |
| 201                                              | Have you heard about spectacles? If your answer is No pass it to Q. 203. | 1. Yes                      2. No                                                                                                                                       |
| 202                                              | What is your source of information?                                      | 1. School<br>2. Mass media<br>3. Colleagues<br>4. Family<br>5. Reading materials<br>6. More than one source<br>7. Others specify it _____                               |
| 203                                              | Do you have a history of training in eye health?                         | 1. Yes                      2. No                                                                                                                                       |

| Section three: Ocular condition-related factors |                                                                |        |                       |
|-------------------------------------------------|----------------------------------------------------------------|--------|-----------------------|
| 301                                             | Do you have a history of eye examinations in the past 2 years? | 1. Yes | 2. No                 |
| 302                                             | Do you have a history of spectacle use?                        | 1. Yes | 2. No                 |
| 303                                             | Do you have a history of ocular trauma?                        | 1. Yes | 2. No                 |
| 304                                             | Do you have a history of self-reported reduction of vision?    | 1. Yes | 2. No                 |
| 305                                             | Do you have a history of cataract surgery?                     | 1. Yes | 2. No                 |
| Section four: Medical condition-related factors |                                                                |        |                       |
| 401                                             | Do you have a known history of diabetes mellitus?              | 1. Yes | 2. No 3. I don't know |
| 402                                             | Do you have a known history of hypertension?                   | 1. Yes | 2. No 3. I don't know |
| Section five: Family-related question           |                                                                |        |                       |
| 501                                             | Does your family have a history of spectacle use?              | 1. Yes | 2. No                 |

| Section six: Questions related to Knowledge towards spectacle use |                                                                                |        |       |
|-------------------------------------------------------------------|--------------------------------------------------------------------------------|--------|-------|
| 601                                                               | Does wearing spectacles make distance vision clearer?                          | 1. Yes | 2. No |
| 602                                                               | Does wearing spectacles make near vision clearer?                              | 1. Yes | 2. No |
| 603                                                               | Does wearing a spectacle protect the eye from hazards?                         | 1. Yes | 2. No |
| 604                                                               | Do timely and properly wearing spectacles decrease visual impairments?         | 1. Yes | 2. No |
| 605                                                               | Can spectacle-wearing make some eyes depend on it?                             | 1. Yes | 2. No |
| 606                                                               | Can eye drops be an alternative for spectacle correction?                      | 1. Yes | 2. No |
| 607                                                               | Can wearing spectacles weaken the power of the eye?                            | 1. Yes | 2. No |
| 608                                                               | Can spectacles prescribed for one person be used for another?                  | 1. Yes | 2. No |
| 609                                                               | Can you get spectacles from hospitals?                                         | 1. Yes | 2. No |
| 610                                                               | Can you get spectacles from a private eye clinic?                              | 1. Yes | 2. No |
| 611                                                               | Can you get spectacles from private optical workshops?                         | 1. Yes | 2. No |
| 612                                                               | If one gets spectacles once, is it always the same for the rest of one's life? | 1. Yes | 2. No |
| 613                                                               | Can spectacles be worn at any age?                                             | 1. Yes | 2. No |
| 614                                                               | Does wearing a professionally not prescribed spectacle cause eye problems?     | 1. Yes | 2. No |
| 615                                                               | Do people who wear spectacles have to wear them regularly?                     | 1. Yes | 2. No |

| Section seven: Questions related to Attitude towards spectacle use |                                                                    |                |       |         |          |                   |
|--------------------------------------------------------------------|--------------------------------------------------------------------|----------------|-------|---------|----------|-------------------|
|                                                                    |                                                                    | Strongly agree | Agree | Neutral | Disagree | Strongly disagree |
| 701                                                                | Wearing spectacles increases your confidence.                      |                |       |         |          |                   |
| 702                                                                | Wearing spectacles makes you unattractive to the opposite sex.     |                |       |         |          |                   |
| 703                                                                | Both sexes can wear spectacles.                                    |                |       |         |          |                   |
| 704                                                                | Wearing spectacles is uncomfortable.                               |                |       |         |          |                   |
| 705                                                                | Wearing spectacles can cause activity limitations.                 |                |       |         |          |                   |
| 706                                                                | People who wear spectacles are visually impaired or have bad eyes. |                |       |         |          |                   |
| 707                                                                | People who wear spectacles are intelligent or smart.               |                |       |         |          |                   |
| 708                                                                | People who wear spectacles are fashionable.                        |                |       |         |          |                   |
| 709                                                                | People who wear spectacles look professional.                      |                |       |         |          |                   |
| 710                                                                | People who wear spectacles are uninteresting.                      |                |       |         |          |                   |
| 711                                                                | The spectacle makes you look better.                               |                |       |         |          |                   |
| 712                                                                | Spectacles are socially unacceptable.                              |                |       |         |          |                   |
| 713                                                                | Spectacles worsen your vision.                                     |                |       |         |          |                   |
| 714                                                                | If you wear spectacles, people will tease you.                     |                |       |         |          |                   |
| 715                                                                | Spectacles cause the eyes to be sunken or pushed in.               |                |       |         |          |                   |
