# Supplementary material for: Knowledge, attitude and the associated factors regarding spectacle use among adults living in Debre Birhan Town, North Shewa, Ethiopia, 2023: a community-based, cross-sectional study
Source: HighWire-hosted journal article supplement (doi:10.1136/bmjopen-2024-086812), 2024-10-01
Supplement: bmjopen-2024-086812supp002_data_supplement.pdf [file bmjopen-2024-086812supp002_data_supplement.pdf]

**Response to Knowledge related questions among study participants in Debre Birhan town, North Shewa, Northeast Ethiopia (n=1022)**

| No  | Knowledge related questions                                                    | Responses       | Frequency  | Percent      |
|-----|--------------------------------------------------------------------------------|-----------------|------------|--------------|
| 1.  | Does wearing spectacles make distance vision clearer?                          | 1. Yes<br>2. No | 866<br>156 | 84.7<br>15.5 |
| 2.  | Does wearing spectacles make near vision clearer?                              | 1. Yes<br>2. No | 850<br>172 | 83.2<br>16.8 |
| 3.  | Does wearing a spectacle protect the eye from hazards?                         | 1. Yes<br>2. No | 959<br>63  | 93.8<br>6.2  |
| 4.  | Do timely and properly wearing spectacles decrease visual impairments?         | 1. Yes<br>2. No | 970<br>52  | 94.9<br>5.1  |
| 5.  | Can spectacle-wearing make some eyes depend on it?                             | 1. Yes<br>2. No | 831<br>191 | 81.3<br>18.7 |
| 6.  | Can eye drops be an alternative for spectacle correction?                      | 1. Yes<br>2. No | 773<br>249 | 75.6<br>24.4 |
| 7.  | Can wearing spectacles weaken the power of the eye?                            | 1. Yes<br>2. No | 233<br>789 | 22.8<br>77.2 |
| 8.  | Can spectacles prescribed for one person be used for another?                  | 1. Yes<br>2. No | 238<br>784 | 23.3<br>76.7 |
| 9.  | Can you get spectacles from hospitals?                                         | 1. Yes<br>2. No | 163<br>859 | 15.9<br>84.1 |
| 10. | Can you get spectacles from a private eye clinic?                              | 1. Yes<br>2. No | 996<br>26  | 97.5<br>2.5  |
| 11. | Can you get spectacles from private optical workshops?                         | 1. Yes<br>2. No | 852<br>170 | 83.4<br>16.6 |
| 12. | If one gets spectacles once, is it always the same for the rest of one's life? | 1. Yes<br>2. No | 241<br>781 | 23.6<br>76.4 |
| 13. | Can spectacles be worn at any age?                                             | 1. Yes<br>2. No | 219<br>803 | 21.4<br>78.6 |
| 14. | Does wearing a professionally not prescribed spectacle cause eye problems?     | 1. Yes<br>2. No | 826<br>196 | 80.8<br>19.2 |
| 15. | Do people who wear spectacles have to wear them regularly?                     | 1. Yes<br>2. No | 635<br>387 | 61.1<br>37.9 |
